# Supplementary material for: Systematic quantification of gene interactions by phenotypic array analysis
Source: Springer Nature journal article supplement (doi:10.1186/gb-2004-5-7-r49), 2004-06-29
Supplement: Additional file 15 [file gb-2004-5-7-r49-s15.doc]

**Additional data files legends**

**Figure s1.** Determination of three concentrations of four different perturbing agents with growth inhibition equivalent to that of 50, 100, and 150 mM HU. Unperturbed reference strain growth is repeated on each panel. These data are contained in Table s3. (**A**) Mean growth curves (n=86), at multiple concentrations of HU (mM) are depicted. The standard deviation is given for 0 and 150 mM HU, the two conditions used to select strains for further testing. Note, growth becomes measurable near the end of exponential phase growth (where the curve is linear on this log-scale plot), and thus the percent standard deviation is high over this range, complicating the direct comparison of growth rates. (**B**) The mean and standard deviation of AUGC for reference strains (n = 86), calculated from the growth curves in panel A, plotted as a function of HU concentration (see Figure 3). (**C-F**) The reference strain growth curve means used to derive the Growth Index values depicted in Figs. 4-6. (**C**) HU concentrations were 50 mM, 100 mM, and 150 mM. (**D**) Miconazole concentrations were 100 nM, 150 nM, and 200 nM. (**E**) Cisplatin concentrations were 150 uM, 200 M, and 250 M. (**F**) Cycloheximide concentrations were 50 ng/ml, 100 ng/ml, and 150 ng/ml. (**G**) TBHP concentrations were 1.0 mM and 1.2 mM. (**H**) The mean growth curves for the intermediate concentrations of each drug are overlain to demonstrate the comparable growth inhibition.

**Figure s2.** Intrinsic growth of all deletion strains and example growth curves for synergistic and antagonistic interactions. (**A**) The distribution of AUGC values for unperturbed deletion strains (n = 4852, bin size = 100). Growth deficiency of many deletion strains, in the absence of any additional perturbation, indicated the need to normalize the perturbed growth of each strain against its intrinsic growth to enrich for non-additive interactions by the Growth Index (see Figure 2). Strains with intrinsic growth less than AUGC = 600 (depicted on X-axis) were excluded from the analysis, because low intrinsic growth is associated with increased noise and lack of reproducibility in the Growth Index calculation. The distribution (n = 192, bin size = 200) of AUGC values is also shown for the reference strain (dashed lines). Intrinsic growth (‘C AUGC’) values for individual strains are given in Additional data file 7. (**B-C**) Growth curves, for deletion strains with Growth Index near the cutoffs. Growth curves on 0 and 150 mM are shown for each strain. The mean growth curves with standard deviation for the reference strain (dashed lines, n=192) are repeated on each panel. (**B**) The least synergistic strains (GI just below –5.8). (**C**) The least antagonistic strains (GI just above 5.8).

**Figure s3.** Reproducibility of Growth Index values from independent experiments. On separate dates (06/28/02 and 10/02/02), the same experimental conditions were tested. (**A**) Correlation of intrinsic growth (unperturbed growth on synthetic complete media), measured as AUGC (123 hrs), is shown. (**B-M**) The correlation between Growth Index values for all strains under the same perturbation on different dates is shown. Data from the 10/02/02 experiment are depicted in Figs. 4-6, and given in Additional data file 9.

**Figure s4.** A comparison between drug dilution and cell dilution with respect to the Growth Index.Each of the 298 strains selected from the genome-wide screen were re-tested using different types of HU perturbation, and AUGC was used to calculate Growth Index. (**A**) The effect of varying HU concentration on the distribution of Growth Index values for HU-interacting deletion strains (liquid cultures were diluted 1:3025 before plating to agar). Note, the distributions (n=297, bin size = 3) are all bimodal, with relative weighting in accordance with the degree of HU perturbation (50 mM, 100 mM, and 150 mM HU). (**B**) A single HU concentration, 100 mM was used to examine the effect of cell dilution (1:12.5, 1:156, and 1:1950) on the growth index (see text). The reference strain distributions (dashed lines) (n=86, bin size = 2, range: -2.71<GI<2.76) are also shown in panels A and B. (**C-E**) Correlation between Growth Index values at low (C), medium (D), and high (E) HU perturbations. Data represented in figures A and B are replotted to see the relationship between Growth Index values for each strain by either perturbation strategy. ‘Low’ 50 mM (C), ‘medium’ 100 mM (D), and ‘high’ 150 mM (E) HU concentrations are plotted against cell dilutions 1:12.5, 1:156 and 1:1950, respectively.

**Figure s5.** (**A-I**) Correlation of Growth Index values resulting from perturbation with HU and different drug inhibitors. The inhibitory effect of four other agents on reference strain growth was standardized against 50, 100, and 150 mM HU (see Additional data file 1)**.** For the three different degrees of growth inhibition (low (**A, D, G**), intermediate (**B, E, H**), and high (**C, F, I**)), correlation of Growth Index values between perturbations with HU and miconazole (**A, B, C**), cisplatin (**D, E, F**), or cycloheximide (**G, H, I**) is depicted for all HU-selected strains. Note, correlation is highest between HU and cisplatin, consistent with inhibition of DNA replication as the common mechanism of growth inhibition and gene interaction (see text). Additional data file 9 contains the data depicted here.

**Figure s6.** Clustering sub-analysis (based on gene classifications) of Growth Index data from HU-interacting deletion strains, under growth inhibition with other drugs. (**A**) gene expression, (**B**) cell polarization, (**C**) cell metabolism, (**D**) unknown function (see also table 1 and table s5). The Growth Index is reflected by the color intensity (see Figure 4). “Grp” refers to the cluster designation from Figure 4. Results for the DNA replication and vesicular trafficking pathways are depicted in Figure 6 (see results and discussion).

**Table s1.** AUGC and Growth Index data from the genome wide screen for HU interactions (see **Figure** 2). The AUGC values were calculated at time = 123 hours. Growth Index values were calculated as described in Figure 2. Reference strain values are presented at the bottom of the table.

**Table s2.** Comparison of HU interactions found in different genome-wide screens. This study comprehensively examined the growth response of deletion strains to HU perturbation; other comprehensive studies of response to gamma irradiation (Bennett, et al.) [31] and MMS (Chang, et al.) [32], tested for cross-sensitivity to HU. Table s2 is a union of deletion strains from all three studies, ordered according to the Growth Index. The conditions for each screen were different: This study was in the haploid mat a strains grown on Hartwell’s Complete synthetic growth media [78] with 50 mM, 100 mM, and 150 mM HU added; other screens used homozygous diploid strains grown on YEPD growth media with 100 mM [31] or the haploid mat a deletion strains grown on YEPD with 200 mM HU [32]. Bold lines indicate the synergism and antagonism cutoffs for scoring the 150 mM HU screen, and bolded Growth Index values indicate strains included based on the Growth Index values for the 50 mM screen only.

**Table s3.** AUGC and Growth Index data from the retest of HU-interacting strains for growth on HU, cisplatin, miconazole, cycloheximide, and t-butyl hydrogen peroxide (Figs. 4-6), and from the culture dilution series experiment (Additional data file 4).

**Table s4.** Identity and annotation of genes depicted in Figure 4. The order of genes is the same as in Figure4, and the cluster designations assigned along the right side of Figure 4 are given in column 1, labeled “Grp”. Gene descriptions are from SGD [47].

**Table s5.** Detailed classification of HU-selected strains. Sub-groups were created for sub-cluster analysis as shown in Fig. 6 and Additional data file 6. “Grp” refers to cluster designation in Figure 4. Interaction Index values are copied from Additional data file 12. Gene descriptions are from SGD [47].

**Table s6.** Interaction Index values for all HU-selected deletion strains.

**Table s7.** AUGC and Growth Index data from the genome wide HU screen in the homozygous diploid deletion set. The AUGC values were calculated at time = 114 hrs. A comparison of these data with those in Table s1, the haploid deletion set, is presented in Tables 2 and Additional data file 14.

**Table s8.** A comparison of the Mata haploid and homozygous diploid HU 150 screens. Note: The *rad52* and *mre11* deletion strains, in the diploid set, were shown to be contaminated with neighboring deletion strains by tag-sequencing (see methods; data not shown). The identities of the MATa and MAT(alpha) haploid *rad52* and *mre11* strains were confirmed by tag-sequencing, the diploid created by mating, and strong synergistic phenotypes confirmed by retesting (data not shown).
