# Supplementary figures and images for: Systematic quantification of gene interactions by phenotypic array analysis
Source: Springer Nature journal article supplement (doi:10.1186/gb-2004-5-7-r49), 2004-06-29

Figure S1

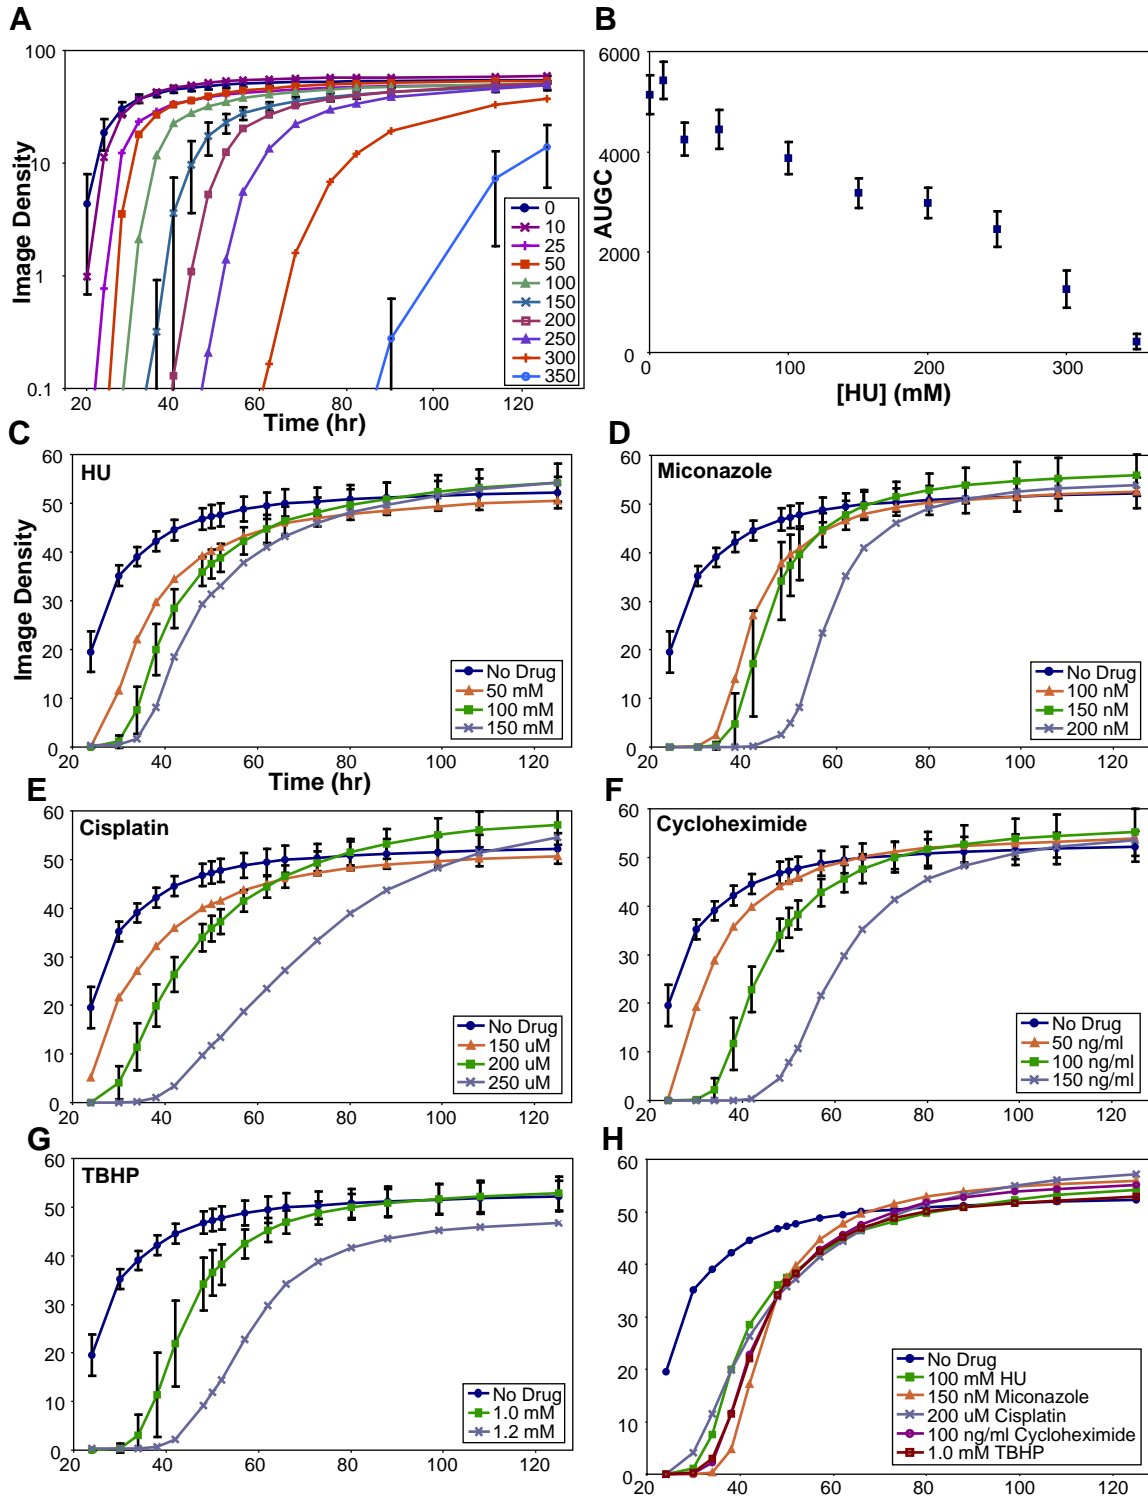

Supplement: Additional file 1 [file gb-2004-5-7-r49-s1.pdf]
